# Supplementary material
Source: publisher site journal article supplement (http://kjim.org/upload/media/kjim-2023-307-Supplementary-Fig-1.pdf)
Supplement: Supplementary file 1 [file kjim-2023-307-Supplementary-Fig-1.pdf]

STEMI group

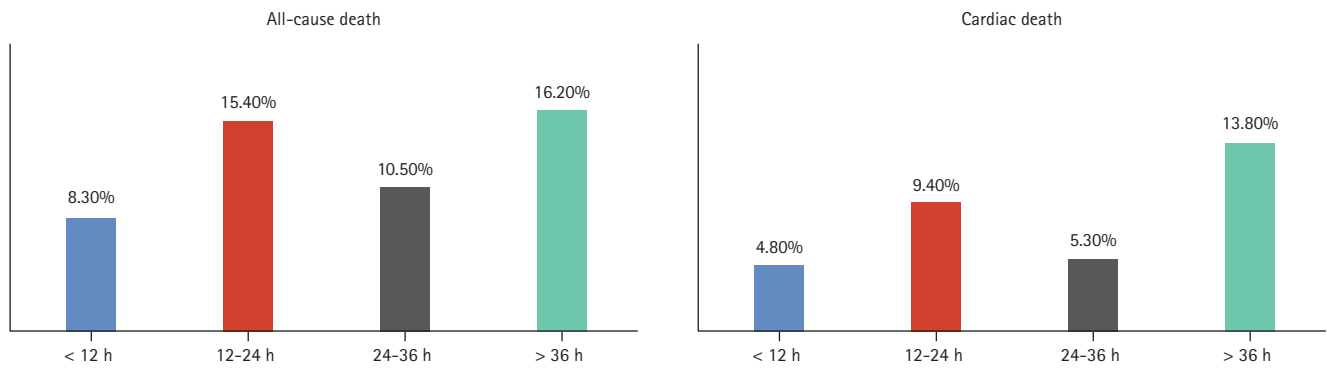

NSTEMI group

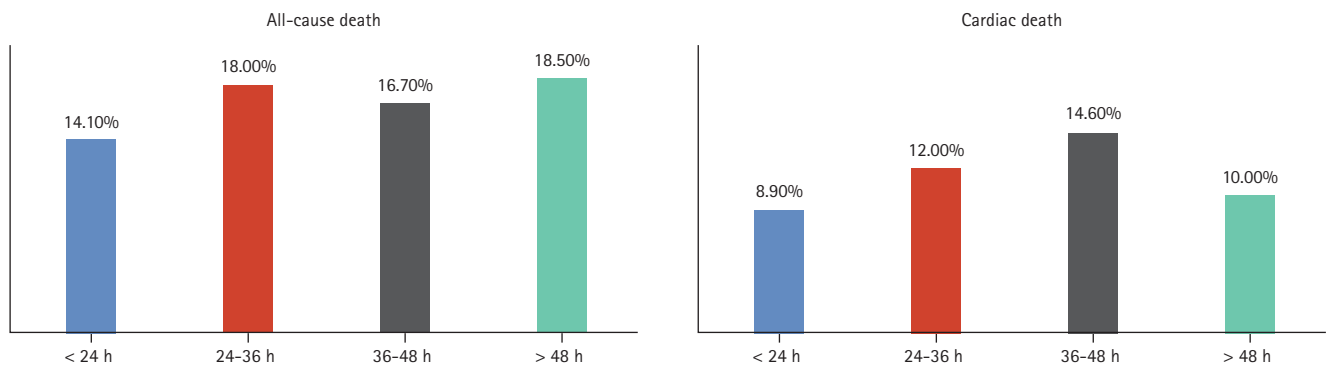

**Supplementary Figure 1.** Mortality rates (all-cause and cardiac) according to different time windows of presentation. NSTEMI, non-ST-elevation myocardial infarction; STEMI, ST-elevation myocardial infarction.
